# Supplementary material for: Computational analysis of high-risk SNPs in human CHK2 gene responsible for hereditary breast cancer: A functional and structural impact
Source: PubMed Central journal article supplement (PMC6688789; doi:10.1371/journal.pone.0220711), 2019-08-09
Supplement: pone.0220711.s001.pdf [file pone.0220711.s001.pdf]

# ConSurf Results

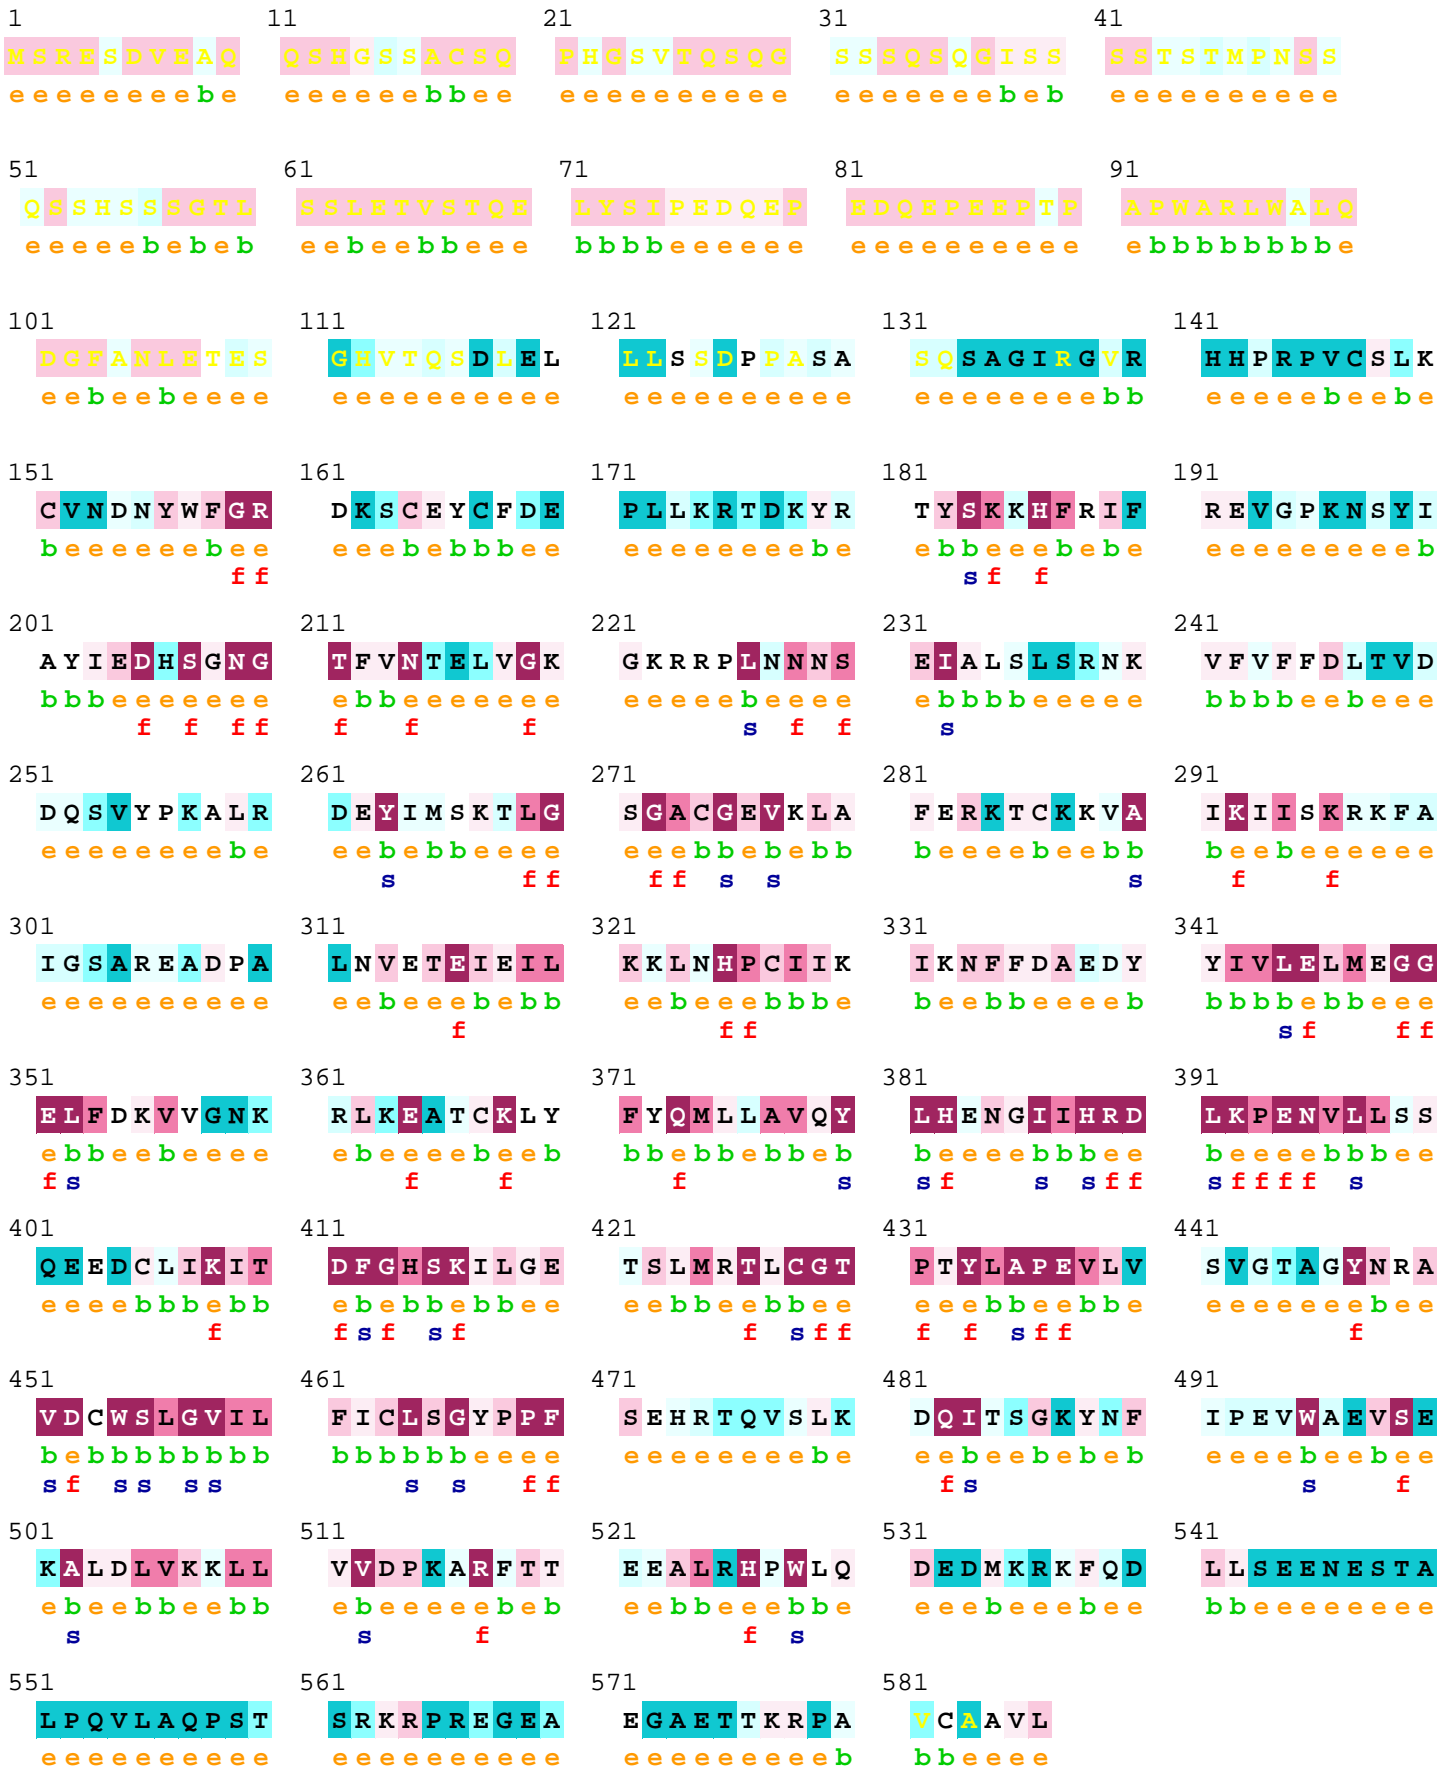

The conservation scale:

1 2 3 4 5 6 7 8 9

Variable      Average      Conserved

- e** - An exposed residue according to the neural-network algorithm.
- b** - A buried residue according to the neural-network algorithm.
- f** - A predicted functional residue (highly conserved and exposed).
- s** - A predicted structural residue (highly conserved and buried).
- x** - Insufficient data - the calculation for this site was performed on less than 10% of the sequences.
